# Supplementary material
Source: Springer Nature journal article supplement (https://www.springermedizin.de/resource/supplementary/13256_2013_2537_MOESM2_ESM.pdf/9649898)

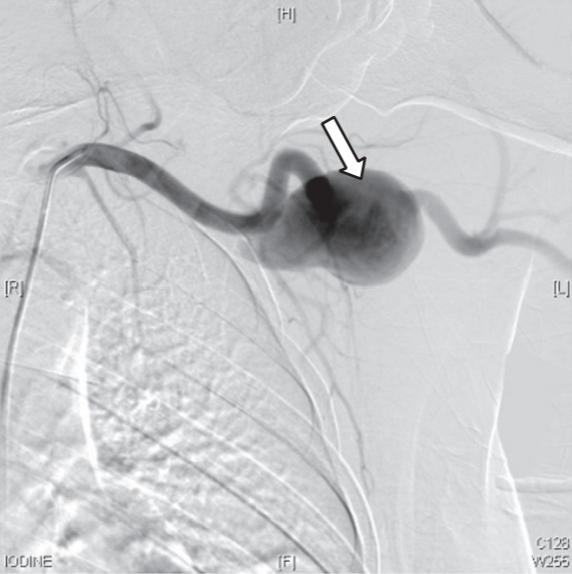

[H]

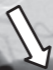

[R]

[L]

IODINE

[F]

C128  
W255

Supplement: MOESM2 [file 9649898]
